# Supplementary material for: Association between Types of Screen Time and Weight Status during the COVID-19 Pandemic: A Longitudinal Study in Children and Adolescents
Source: MDPI journal article supplement (doi:10.3390/nu15092055), 2023-04-24
Supplement: s1 [file s1]

Table S1 Baseline and follow-up measurement dates

| <b>Date</b>         | <b>Significant events</b>                              |
|---------------------|--------------------------------------------------------|
| January 3rd to 21st | Baseline survey                                        |
| January 24th        | Level 1 public health emergency response declared      |
| January 25th        | The lockdown began                                     |
| March 2nd           | Primary and secondary schools started online classes   |
| March 13nd to 23rd  | Follow-up survey                                       |
| March 24th          | Public health emergency response downgraded to level 2 |
| March 25th -        | The lockdown relaxed                                   |

Table S2 Longitudinal data analysis using mixed effect models studying effects of screen time on BMI

| Parameter                       | Estimate (95%CI) <sub>a</sub> | Estimate (95%CI) <sub>b</sub> | Estimate (95%CI) <sub>c</sub> |
|---------------------------------|-------------------------------|-------------------------------|-------------------------------|
| <b>Recreational screen time</b> |                               |                               |                               |
| Watching TV/videos              | <b>0.097 (0.039-0.154)</b>    | <b>0.091 (0.034-0.148)</b>    | <b>0.091 (0.033-0.148)</b>    |
| Computer/smartphone gaming      | 0.008 (-0.051-0.066)          | 0.004 (-0.055-0.063)          | 0.003 (-0.055-0.062)          |
| Social media use                | 0.027 (-0.032-0.086)          | 0.025 (-0.034-0.084)          | 0.025 (-0.034-0.084)          |
| Browsing webpages               | 0.032 (-0.022-0.087)          | 0.033 (-0.021-0.087)          | 0.033 (-0.021-0.087)          |
| Total                           | <b>0.077 (0.016-0.138)</b>    | <b>0.072 (0.011-0.133)</b>    | <b>0.071 (0.010-0.132)</b>    |
| <b>Educational screen time</b>  |                               |                               |                               |
| Online homework                 | -0.022 (-0.077-0.034)         | -0.024 (-0.080-0.031)         | -0.025 (-0.081-0.030)         |
| Online class                    | 0.009 (-0.058-0.077)          | 0.005 (-0.062-0.072)          | 0.006 (-0.061-0.073)          |
| Total                           | -0.003 (-0.072-0.066)         | -0.008 (-0.077-0.061)         | -0.008 (-0.076-0.061)         |

Abbreviations: CI, confidence interval

Estimate (95%CI)<sub>a</sub>: Adjusting for grade and sex

Estimate (95%CI)<sub>b</sub>: Adjusting for grade, sex, parental educational levels, and parental BMI

Estimate (95%CI)<sub>c</sub>: Adjusting for grade, sex, parental educational levels, parental BMI, physical activity level, and total energy intake

Bold lines indicate significant associations (p<0.05)

Estimates and CIs were derived from the regression coefficients of linear mixed-effect model

Table S3 Longitudinal data analysis using mixed effect models studying age-stratified effects of screen time on BMI

| Parameter                       | Estimate (95%CI) <sub>a</sub> | Estimate (95%CI) <sub>b</sub> | Estimate (95%CI) <sub>c</sub> |
|---------------------------------|-------------------------------|-------------------------------|-------------------------------|
| <b>Children (n = 649)</b>       |                               |                               |                               |
| <b>Recreational screen time</b> |                               |                               |                               |
| Watching TV/videos              | 0.118 (-0.005-0.242)          | 0.105 (-0.018-0.228)          | 0.103 (-0.020-0.227)          |
| Computer/smartphone gaming      | 0.012 (-0.113-0.138)          | -0.002 (-0.128-0.123)         | -0.007 (-0.132-0.119)         |
| Social media use                | 0.035 (-0.083-0.153)          | 0.034 (-0.084-0.151)          | 0.035 (-0.083-0.153)          |
| Browsing webpages               | 0.018 (-0.096-0.132)          | 0.019 (-0.095-0.134)          | 0.020 (-0.094-0.135)          |
| Total                           | 0.099 (-0.030-0.224)          | 0.085 (-0.042-0.211)          | 0.083 (-0.044-0.210)          |
| <b>Educational screen time</b>  |                               |                               |                               |
| Online homework                 | -0.052 (-0.172-0.068)         | -0.053 (-0.173-0.066)         | -0.058 (-0.178-0.063)         |
| Online literature class         | 0.047 (-0.114-0.210)          | 0.046 (-0.115-0.208)          | 0.050 (-0.111-0.212)          |
| Total                           | 0.007 (-0.154-0.168)          | 0.005 (-0.155-0.166)          | 0.006 (-0.155-0.167)          |
| <b>Adolescents (n = 1579)</b>   |                               |                               |                               |
| <b>Recreational screen time</b> |                               |                               |                               |
| Watching TV/videos              | <b>0.070 (0.007-0.134)</b>    | <b>0.067 (0.003-0.130)</b>    | <b>0.066 (0.003-0.130)</b>    |
| Computer/smartphone gaming      | 0.011 (-0.053-0.075)          | 0.009 (-0.055-0.074)          | 0.008 (-0.056-0.073)          |
| Social media use                | 0.060 (-0.004-0.124)          | 0.058 (-0.006-0.122)          | 0.057 (-0.007-0.121)          |
| Browsing webpages               | 0.040 (-0.021-0.100)          | 0.042 (-0.019-0.102)          | 0.041 (-0.010-0.102)          |
| Total                           | <b>0.081 (0.013-0.149)</b>    | <b>0.078 (0.010-0.145)</b>    | <b>0.077 (0.009-0.145)</b>    |
| <b>Educational screen time</b>  |                               |                               |                               |
| Online homework                 | -0.004 (-0.065-0.057)         | -0.006 (-0.067-0.055)         | -0.006 (-0.068-0.055)         |
| Online class                    | -0.004 (-0.074-0.067)         | -0.007 (-0.078-0.064)         | -0.006 (-0.077-0.065)         |
| Total                           | -0.005 (-0.078-0.068)         | -0.009 (-0.082-0.064)         | -0.009 (-0.082-0.064)         |

Abbreviations: CI, confidence interval

Estimate (95%CI)<sub>a</sub>: Adjusting for grade and sex

Estimate (95%CI)<sub>b</sub>: Adjusting for grade, sex, parental educational levels, and parental BMI

Estimate (95%CI)<sub>c</sub>: Adjusting for grade, sex, parental educational levels, parental BMI, physical activity level, and total energy intake

Bold lines indicate significant associations ( $p < 0.05$ )

Estimates and CIs were derived from the regression coefficients of linear mixed-effect model
